# Supplementary material for: Bovine Exome Sequence Analysis and Targeted SNP Genotyping of Recessive Fertility Defects BH1, HH2, and HH3 Reveal a Putative Causative Mutation in SMC2 for HH3
Source: PLoS One. 2014 Mar 25;9(3):e92769. doi: 10.1371/journal.pone.0092769 (PMC3965462; doi:10.1371/journal.pone.0092769)
Supplement: Table S2 — Original and refined BH1 derived from BovineSNP50 haplotypes. (XLSX) [file pone.0092769.s002.xlsx]

## Sheet: Sheet1
Table S2. Original and refined BH1 derived from BovineSNP50 haplotypes
Haplotype1	Chr	Position	SNP	Illumina A/B allele
O	7	42545709	ARS-BFGL-NGS-7310	B
O	7	42580647	BTB-01871912	B
O	7	42609605	BTB-00307738	A
O	7	42618497	BTB-00307534	A
O	7	42645056	BTB-00307598	B
R	7	42811272	BTB-01207097	B
R	7	42845260	BTB-01207246	A
R	7	43106593	BTB-00308737	A
R	7	43132401	BTB-01207822	B
R	7	43156587	ARS-BFGL-NGS-104485	B
R	7	43214641	ARS-BFGL-NGS-104510	A
R	7	43224755	ARS-BFGL-NGS-76328	B
R	7	43292715	ARS-BFGL-NGS-11889	A
R	7	43311132	BTB-02092796	B
R	7	43385709	BTB-01561790	A
R	7	43391413	ARS-BFGL-NGS-75099	B
R	7	43418148	ARS-BFGL-NGS-64546	A
R	7	43538228	BTB-02079599	B
R	7	43592173	ARS-BFGL-NGS-23491	B
R	7	43653110	ARS-BFGL-NGS-13798	A
R	7	43808593	BTB-00308411	B
R	7	43822790	ARS-BFGL-NGS-100100	B
R	7	43908308	ARS-BFGL-NGS-119127	B
R	7	43941988	ARS-BFGL-NGS-94413	B
R	7	43966998	ARS-BFGL-NGS-35596	A
R	7	43999546	BTB-00308656	A
R	7	44136041	BTB-01713009	B
R	7	44238978	ARS-BFGL-NGS-22438	A
R	7	44337762	ARS-BFGL-NGS-6970	A
R	7	44490836	BTB-01991791	A
R	7	44585963	ARS-BFGL-NGS-83376	B
R	7	44620188	ARS-BFGL-NGS-112360	A
R	7	44658442	Hapmap46695-BTA-26440	A
R	7	44720216	ARS-BFGL-NGS-74330	A
R	7	44778539	UA-IFASA-5544	B
R	7	44901489	ARS-BFGL-NGS-5136	B
R	7	44946039	ARS-BFGL-NGS-21638	A
R	7	45162340	ARS-BFGL-NGS-54341	B
R	7	45196738	Hapmap47202-BTA-121802	A
R	7	45262304	Hapmap27055-BTA-99423	A
R	7	45327282	ARS-BFGL-NGS-24413	B
R	7	45383502	ARS-BFGL-NGS-109712	A
R	7	45412030	ARS-BFGL-NGS-109750	B
R	7	45439468	ARS-BFGL-NGS-37158	B
R	7	45491254	ARS-BFGL-NGS-10710	A
R	7	45497213	ARS-BFGL-NGS-87868	B
R	7	45559515	ARS-BFGL-NGS-115860	A
R	7	45615115	ARS-BFGL-NGS-63961	B
R	7	45638520	ARS-BFGL-NGS-107073	B
R	7	45870151	ARS-BFGL-NGS-76390	B
R	7	45948544	Hapmap49311-BTA-78907	B
R	7	45966735	ARS-BFGL-NGS-73679	A
R	7	46003588	ARS-BFGL-NGS-5595	A
R	7	46025089	ARS-BFGL-NGS-69626	A
R	7	46109256	ARS-BFGL-NGS-31234	B
R	7	46190019	Hapmap42327-BTA-78943	A
R	7	46293900	ARS-BFGL-NGS-73655	A
R	7	46354401	Hapmap43477-BTA-116657	B
R	7	46372699	Hapmap42133-BTA-21378	A
R	7	46453487	BTB-00309317	B
R	7	46477516	ARS-BFGL-NGS-69121	B
R	7	46553716	BTB-00309040	A
R	7	46574843	ARS-BFGL-NGS-45683	B
R	7	46626888	ARS-BFGL-NGS-106936	A
R	7	46731571	ARS-BFGL-NGS-35767	A
R	7	46752740	ARS-BFGL-NGS-62792	B
R	7	46807523	ARS-BFGL-NGS-116420	B
R	7	46835388	BTB-01401147	B
R	7	46883556	ARS-BFGL-NGS-64956	B
R	7	46902161	ARS-BFGL-NGS-62333	A
R	7	46929710	BTA-88698-no-rs	A
R	7	46954435	ARS-BFGL-NGS-58321	B
R	7	46981340	BTB-01400946	B
R	7	47002161	Hapmap47127-BTA-88691	A
1. SNP in original 50K haplotype, R=SNP in refined and original 50K haplotype
