# Supplementary material for: Bovine Exome Sequence Analysis and Targeted SNP Genotyping of Recessive Fertility Defects BH1, HH2, and HH3 Reveal a Putative Causative Mutation in SMC2 for HH3
Source: PLoS One. 2014 Mar 25;9(3):e92769. doi: 10.1371/journal.pone.0092769 (PMC3965462; doi:10.1371/journal.pone.0092769)
Supplement: Table S4 — Original and refined HH3 derived from BovineSNP50 haplotypes. (XLSX) [file pone.0092769.s004.xlsx]

## Sheet: Sheet1
Table S4. Original and refined HH3 derived from BovineSNP50 haplotypes
Haplotype1	Chr	Position	SNP	Illumina A/B allele
O	8	92485682	ARS-BFGL-NGS-44247	B
O	8	92549869	BTA-101737-no-rs	A
O	8	92575940	BTB-01415906	B
O	8	92627675	Hapmap49330-BTA-82198	B
O	8	92657249	BTB-00366038	A
O	8	92700263	Hapmap38258-BTA-82187	B
O	8	92792703	ARS-BFGL-NGS-107648	B
O	8	92916562	BTB-00368086	B
O	8	92972234	ARS-BFGL-NGS-64799	B
O	8	93055587	BTB-00488829	A
O	8	93090764	BTB-00488794	A
O	8	93171893	ARS-BFGL-NGS-87787	A
O	8	93276825	BTA-105718-no-rs	B
O	8	93307317	BTB-01069323	A
O	8	93382177	ARS-BFGL-NGS-1517	B
O	8	93385307	BTA-18258-no-rs	A
O	8	93404723	BTB-01864543	B
O	8	93433032	ARS-BFGL-NGS-19762	B
O	8	93470237	BTB-01364301	A
O	8	93507349	BTB-00366459	A
O	8	93558076	BTA-28965-no-rs	B
O	8	93611407	BTB-01364009	B
O	8	93655394	Hapmap27238-BTA-163742	A
O	8	93725282	BTB-01363633	B
O	8	93733918	BTB-01363589	A
O	8	93786059	BTB-01785453	B
O	8	93825702	BTB-01537249	A
O	8	93896073	BTA-101724-no-rs	B
O	8	93969992	ARS-BFGL-NGS-18836	B
O	8	93998021	BTA-82314-no-rs	A
O	8	94021165	BTB-00367678	A
O	8	94088291	BTB-00367837	A
O	8	94115663	Hapmap35016-BES11_Contig229_940	A
O	8	94157018	BTB-00368041	B
O	8	94258722	BTB-00368101	A
O	8	94327318	Hapmap29632-BTA-82317	B
O	8	94358932	Hapmap41979-BTA-82318	B
O	8	94386951	BTB-00368155	B
O	8	94413416	ARS-BFGL-NGS-54516	A
O	8	94460889	ARS-BFGL-NGS-50038	A
O	8	94531924	ARS-BFGL-NGS-32057	B
O	8	94560328	BTB-00368434	A
O	8	94579362	Hapmap59516-rs29027400	B
O	8	94604387	Hapmap50914-BTA-21089	B
O	8	94650099	Hapmap60096-rs29025529	B
O	8	94708244	BTB-01734135	A
O	8	94810609	Hapmap42689-BTA-82250	A
O	8	94906646	BTB-00366560	B
O	8	94973599	BTB-00366836	A
O	8	95003606	BTB-00366930	B
R	8	95057877	BTB-00366966	B
R	8	95085291	BTB-00366976	A
R	8	95119569	BTB-01354175	A
R	8	95157430	BTB-01354201	A
R	8	95228955	ARS-BFGL-NGS-35261	A
R	8	95400554	BTB-01266056	B
R	8	95417809	BTB-01729666	B
R	8	95468310	ARS-BFGL-NGS-52705	B
O	8	95498189	BTB-01266196	A
O	8	95563701	ARS-BFGL-NGS-101333	B
O	8	95603538	BTB-01266301	B
O	8	95625807	ARS-BFGL-NGS-65636	B
O	8	95739431	ARS-BFGL-NGS-61793	B
O	8	95890694	ARS-BFGL-NGS-22109	A
O	8	96199051	ARS-BFGL-NGS-109757	A
O	8	96238914	ARS-BFGL-NGS-112165	B
O	8	96266647	BTB-00367562	A
O	8	96294159	ARS-BFGL-NGS-113098	B
O	8	96324054	ARS-BFGL-NGS-14436	A
O	8	96366646	BTA-82304-no-rs	A
O	8	96387986	Hapmap38440-BTA-82296	A
O	8	96468448	Hapmap41365-BTA-82290	A
O	8	96498706	BTB-00367351	A
O	8	96594716	BTA-82272-no-rs	A
1. SNP in original 50K haplotype, R=SNP in refined and original 50K haplotype
